# Supplementary material for: Understanding the Quality of Life and Its Related Factors in Orthodontics Postgraduate Students: A Mixed Methods Approach
Source: MDPI journal article supplement (doi:10.3390/dj11020039), 2023-02-06
Supplement: s1 [file s1]

**Table S1.** General profile of the study sample of postgraduate students (n=84)

| Variables                                                  | n    | %    |
|------------------------------------------------------------|------|------|
| Sociodemographic                                           |      |      |
| Sex                                                        |      |      |
| Females                                                    | 54   | 64.3 |
| Males                                                      | 30   | 35.7 |
| Age <sup>a</sup>                                           |      |      |
| Median (IQR)                                               | 29.0 | 4.0  |
| Marital status                                             |      |      |
| Single                                                     | 60   | 71.4 |
| Married/Cohabitated                                        | 21   | 25.0 |
| Separate                                                   | 3    | 3.6  |
| Socioeconomic status                                       |      |      |
| Low- Middle                                                | 56   | 69.0 |
| High                                                       | 30   | 31.0 |
| Housing                                                    |      |      |
| Own                                                        | 50   | 59.5 |
| Rented                                                     | 25   | 29.8 |
| Other                                                      | 9    | 10.7 |
| Vehicle                                                    |      |      |
| Yes                                                        | 47   | 56.0 |
| No                                                         | 37   | 44.0 |
| Type of Family                                             |      |      |
| Nuclear                                                    | 54   | 64.3 |
| Assembled                                                  | 2    | 2.4  |
| Extended                                                   | 3    | 3.6  |
| Single-parent                                              | 10   | 11.9 |
| Live alone                                                 | 15   | 17.9 |
| Labor conditions                                           |      |      |
| Years of experience as a dentist <sup>a</sup>              |      |      |
| Median (IQR)                                               | 6.0  | 5.0  |
| Currently working                                          |      |      |
| No                                                         | 35   | 41.7 |
| Yes                                                        | 49   | 58.3 |
| Having several workplaces (n=49)                           |      |      |
| No                                                         | 28   | 57.1 |
| Yes                                                        | 21   | 42.9 |
| Academic conditions                                        |      |      |
| Daily hours of face-to-face academic schedule <sup>a</sup> |      |      |
| Median (IQR)                                               | 7.0  | 3.0  |
| Weekly study hours <sup>a</sup>                            |      |      |
| Median (IQR)                                               | 40.0 | 35.0 |
| Resting days per week <sup>a</sup>                         |      |      |
| Median (IQR)                                               | 1.0  | 1.0  |

|                                                              |      |      |
|--------------------------------------------------------------|------|------|
| Postgraduate monthly expenses (Colombian peso) <sup>b</sup>  |      |      |
| ≤ de 3.000.000 (≤ U\$ 750)                                   | 63   | 75.0 |
| ≥ de 3.000.001 (≥ U\$ 751)                                   | 21   | 25.0 |
| Study-leisure balance                                        |      |      |
| Balanced                                                     | 7    | 8.3  |
| Unbalanced                                                   | 77   | 91.7 |
| Foreign language proficiency                                 |      |      |
| No                                                           | 40   | 47.6 |
| Yes                                                          | 44   | 52.4 |
| Satisfaction with the postgraduate experience                |      |      |
| Satisfied                                                    | 72   | 85.7 |
| Unsatisfied                                                  | 12   | 14.3 |
| Postgraduate stress level                                    |      |      |
| Non-stressful                                                | 4    | 4.8  |
| Stressful                                                    | 80   | 95.2 |
| Annual frequency of events of academic training <sup>a</sup> |      |      |
| Median (IQR)                                                 | 9.0  | 20.0 |
| Quality of Life (QOL)                                        |      |      |
| Physical <sup>a</sup>                                        |      |      |
| Median (IQR)                                                 | 50.0 | 21.4 |
| Psychological <sup>a</sup>                                   |      |      |
| Median (IQR)                                                 | 62.5 | 16.7 |
| Social relationships <sup>a</sup>                            |      |      |
| Median (IQR)                                                 | 58.3 | 25.0 |
| Environment <sup>a</sup>                                     |      |      |
| Median (IQR)                                                 | 56.3 | 18.8 |
| Health                                                       |      |      |
| Sports practice                                              |      |      |
| Yes                                                          | 29   | 34.5 |
| No                                                           | 55   | 65.5 |
| Body Mass Index (BMI)                                        |      |      |
| Underweight                                                  | 6    | 7.1  |
| Normal                                                       | 57   | 67.9 |
| Overweight/obesity                                           | 21   | 25.0 |
| Self-perceived health                                        |      |      |
| Good                                                         | 56   | 66.7 |
| Poor                                                         | 28   | 33.3 |
| Mental health (GHQ-12)                                       |      |      |
| Good                                                         | 39   | 46.4 |
| Poor                                                         | 45   | 53.6 |
| Social support (Duke-UNC-11)                                 |      |      |
| Normal                                                       | 75   | 89.3 |
| Low                                                          | 9    | 10.7 |

<sup>a</sup> Kolmogorov-Smirnov test for Normality. <sup>b</sup> Dollar values between parenthesis (at the time of the fieldwork). IQR: Interquartile range

**Table S2.** Verbatim extracts from participants' discourses in focus groups (n=3)

| Categories                                                            | Key words                      | Verbatim extracts form participants' discourses                                                                                                                                                                                                                                                                                                                                                                                                                                                                                                                                    |
|-----------------------------------------------------------------------|--------------------------------|------------------------------------------------------------------------------------------------------------------------------------------------------------------------------------------------------------------------------------------------------------------------------------------------------------------------------------------------------------------------------------------------------------------------------------------------------------------------------------------------------------------------------------------------------------------------------------|
| 1) Quality of life: definitions, determinants, satisfiers             | Variable concept               | a) "Because maybe for me quality of life can be emotional stability and, I don't know, economic stability, but for someone else it can be health. It can be a very different concept for each person, depending on its economic, familiar, social situation" (FG 1)                                                                                                                                                                                                                                                                                                                |
|                                                                       | Conditions for quality of life | b) "I think that it's about having stability and having positive conditions in general: it can be in the family aspect, in the personal aspect, the emotional aspect, having stability. For people like us, doing the residency and working too, it's about having work stability, an academic stability, meaning that the academy doesn't turn into a problem, but rather into a rewarding moment. Then finally perhaps the economic part which is like the support, and it's quite important for us at this moment as professionals who are going through the residency." (FG 3) |
|                                                                       |                                | c) "I think that what can vary is your environment, the pressure that you endure, basically that's what could alter your quality of life: the pressure, the stress and the environment where you are. It's focused on that" (FG 2)                                                                                                                                                                                                                                                                                                                                                 |
|                                                                       |                                | d) "Well, I do believe that in the family they can help, but also the colleagues are a very important support because they are the ones who really understand the situation you are going through" (FG 1)                                                                                                                                                                                                                                                                                                                                                                          |
|                                                                       | Satisfiers                     | e) "Well, the social welfare activities that the University does, you don't really have time to be able to take advantage of them, then on some occasions they are done but, well, the university can do this or that, but then no, you don't have time. Mostly, I think about time management and perhaps changing some university policies that allow you to have more time to perform activities other than the academic ones" (FG 3)                                                                                                                                           |
|                                                                       |                                | f) "The other thing is also television, social media, sports. I really like football, watching it, not playing it, but watching it a lot and as much as I can. Family and social activities also strengthen you and strengthen the family, which is fundamental." (FG 3)                                                                                                                                                                                                                                                                                                           |
|                                                                       | COVID-19                       | g) "With COVID it increased, for me... at first it was the shock of the teachers not being prepared, anyone, nobody was really prepared, so what did they do? More, more and more load, more work, more work, more work, more work, then it was a bigger burden." (FG 2)                                                                                                                                                                                                                                                                                                           |
|                                                                       |                                | h) "In the social aspect, it didn't affect me so much because I don't go out often, so it didn't affect me so much, but in the clinical aspect, yes, for me it is... Now I am already used to it, but this whole business of using all those biosafety things, for me it was exasperating, not to be able to speak well with my patients, they not being able to look at me in the eye, I mean, to suffocate with that, that did affect me. But now I already got used to it (laughter)" (FG 2)                                                                                    |
| 2) A rollercoaster: the postgraduate program like a personal life and | Overload                       | a) "In my case, I had to stop working for a year and a half, or the first three semesters because the academic load didn't really allow me to fulfill, let's say, my academic duties. It really forced me to that and also to give up family moments, personal moments with my partner" (FG 3)                                                                                                                                                                                                                                                                                     |

**an academic  
project**

**Teacher-  
student  
relationship**

b) *"Also it would be ideal if teachers recognized postgraduate students as professionals and not only students, I mean, if they could see them maybe not like an equal per se because ultimately it's not quite an equal, but like a professional, which is, a person who went through five years of undergraduate studies, that has a different perception of life, that is not an immature undergraduate student, I mean that vision from teachers... or that treatment from teachers towards residents"* (FG 1)

c) *"I also felt changes in the treatment from the teachers with the students. Maybe in the clinical part teachers are a little stricter and often times learning doesn't mean treating badly, often times you learn easier in other ways, and you start disliking things or you don't do them out of fear but out of responsibility"* (FG 2)

**Respect for  
non-academic  
spaces**

d) *"And the second thing is that each postgraduate program, let's say all the teacher's academic group and on the administrative side, they should keep in mind to respect the non-academic spaces of each student, starting off from the fact that all of us who register into a postgraduate program are adults, who must organize our own time, so they shouldn't expect to take up those spaces that can get to be non-academic. For example, a teacher shouldn't text you in WhatsApp on a Saturday or Sunday night asking for postgraduate-related things, but instead obviously consider that although we have certain responsibilities regarding the postgraduate program, also like respect each space that can be defined as non-academic, such as weekends, Saturday night, Sunday, when you could be doing other things and not be focusing exclusively on the matter of the postgraduate program"* (FG 3)

**Adaptation  
process**

e) *"That question at this moment, truth be told, today, I feel super happy and fulfilled, if that question had been done last semester, I can tell you that my answer would have been completely unhappy, because that's how I felt, unhappy. I was telling my husband to tell me what happiness was to him, and so he told me it was everything that I didn't have: time, time to be with my family, being able to rest, being able to sleep well. But now, as we get to our last year, because we are in our last year of residency, we've had less academic load, less assignments, what the other participant was saying, like rather more clinical practice, that distress of looking for patients, of not knowing if we are going to get them is no longer there, because we are already more balanced, so right now, yes, I feel happy, content."* (FG 1)

**Personal and  
professional  
step**

f) *"The meaning that the postgraduate program has for me it's like a step, one more step in my life as a professional and as a person, and everything that you learn in this life is a win, no matter what the subject is. Here specifically is about the profession that I chose and so I think that's going to make me better from now on".* (FG 3)
